# Supplementary material for: The biochemical and metabolic profiles of dairy cows with mycotoxins-contaminated diets
Source: PeerJ. 2020 Mar 26;8:e8742. doi: 10.7717/peerj.8742 (PMC7103205; doi:10.7717/peerj.8742)
Supplement: Data S1 [file peerj-08-8742-s001.xlsx]

## Sheet: feed&milk
group	order	date	period	中			晚			早			全天	feed intake (kg)	milk yield (kg)
				投料量kg	剩料量kg	采食量kg	投料量kg	剩料量kg	采食量kg	投料量kg	剩料量kg	采食量kg	采食量kg
H	1	1216	-1	16	2.68	13.32	15	4.3	10.7	15	0.76	14.24	38.26	20.1922	7
	2	1216	-1	16	1.16	14.84	15	4.56	10.44	15	3.22	11.78	37.06	19.5801	13.8
	3	1216	-1	16	1.7	14.3	15	2.58	12.42	15	0.2	14.8	41.52	21.855	9.4
	4	1216	-1	16	0.16	15.84	15	1.32	13.68	15	0.24	14.76	44.28	23.2628	13.9
	5	1216	-1	16	0.58	15.42	15	3.26	11.74	15	0.8	14.2	41.36	21.7734	18.2
	6	1216	-1	16	0.68	15.32	15	2.3	12.7	15	2.3	12.7	40.72	21.4469	17
	7	1216	-1	16	0.08	15.92	15	0.76	14.24	15	0	15	45.16	23.7116	21.6
	8	1216	-1	16	0.56	15.44	15	0.22	14.78	15	0	15	45.22	23.7422	24
I	1	1216	-1	16	0.02	15.98	15	1.18	13.82	15	0.2	14.8	44.6	23.8629	11.6
	2	1216	-1	16	0.18	15.82	15	3.26	11.74	15	0.2	14.8	42.36	22.7374	14.4
	3	1216	-1	16	0.64	15.36	15	3.54	11.46	15	1	14	40.82	21.9637	14.6
	4	1216	-1	16	1.96	14.04	15	4.54	10.46	15	6.4	8.6	33.1	18.0849	12.7
	5	1216	-1	16	1.66	14.34	15	3.2	11.8	15	0.58	14.42	40.56	21.833	19.6
	6	1216	-1	16	0.34	15.66	15	4.44	10.56	15	0.76	14.24	40.46	21.7828	17.4
	7	1216	-1	16	0.08	15.92	15	2.4	12.6	15	0.52	14.48	43	23.059	23.5
	8	1216	-1	16	0.46	15.54	15	0.68	14.32	15	0.76	14.24	44.1	23.6117	24
J	1	1216	-1	16	0.24	15.76	15	5.78	9.22	15	1.1	13.9	38.88	20.6515	7.5
	2	1216	-1	16	3.84	12.16	15	2.9	12.1	15	1.64	13.36	37.62	20.0159	8.1
	3	1216	-1	16	0.5	15.5	15	0.8	14.2	15	0.44	14.56	44.26	23.3655	14.1
	4	1216	-1	16	1.46	14.54	15	5	10	15	0.4	14.6	39.14	20.7826	14.7
	5	1216	-1	16	0.48	15.52	15	5	10	15	0.7	14.3	39.82	21.1257	21.2
	6	1216	-1	16	1.28	14.72	15	0.24	14.76	15	4.86	10.14	39.62	21.0248	20.15
	7	1216	-1	16	0.56	15.44	15	1.16	13.84	15	1.72	13.28	42.56	22.5079	22.6
	8	1216	-1	16	0	16	15	0.94	14.06	15	0.14	14.86	44.92	23.6984	21.7
H	1	1217	1	15	3.4	11.6	14	3.36	10.64	15	0.1	14.9	37.14	19.5915	6.6
	2	1217	1	15	0.56	14.44	14	3.6	10.4	15	5.06	9.94	34.78	18.3877	13.7
	3	1217	1	15	0.14	14.86	14	3.72	10.28	15	2.1	12.9	38.04	20.0505	9.5
	4	1217	1	15	0.3	14.7	14	2.54	11.46	15	2.9	12.1	38.26	20.1627	13.7
	5	1217	1	15	0.8	14.2	14	3.7	10.3	15	1.94	13.06	37.56	19.8057	18.4
	6	1217	1	15	0.52	14.48	14	2.02	11.98	15	3.3	11.7	38.16	20.1117	16.6
	7	1217	1	15	0	15	14	0.54	13.46	15	0	15	43.46	22.8151	21.2
	8	1217	1	15	0.06	14.94	14	0.6	13.4	15	4.4	10.6	38.94	20.5096	23.9
I	1	1217	1	15	0.04	14.96	14	0.42	13.58	15	0.98	14.02	42.56	22.7747	11.1
	2	1217	1	15	3.14	11.86	14	4.2	9.8	15	1.12	13.88	35.54	19.2476	13.9
	3	1217	1	15	2.7	12.3	14	2.52	11.48	15	2.64	12.36	36.14	19.549	14.2
	4	1217	1	15	2.52	12.48	14	4.06	9.94	15	4.56	10.44	32.86	17.901	12.6
	5	1217	1	15	0.3	14.7	14	1.22	12.78	15	2.24	12.76	40.24	21.609	18.6
	6	1217	1	15	0	15	14	1.64	12.36	15	2.32	12.68	40.04	21.5085	17
	7	1217	1	15	0.44	14.56	14	4.22	9.78	15	1.28	13.72	38.06	20.5137	24.1
	8	1217	1	15	0.2	14.8	14	1.4	12.6	15	0.52	14.48	41.88	22.433	24
J	1	1217	1	15	1.6	13.4	14	5.46	8.54	15	4.42	10.58	32.52	17.398	6.7
	2	1217	1	15	1.04	13.96	14	2.54	11.46	15	0.8	14.2	39.62	20.9796	8.7
	3	1217	1	15	1.38	13.62	14	4	10	15	0.38	14.62	38.24	20.2835	14.1
	4	1217	1	15	2.64	12.36	14	5.42	8.58	15	4.3	10.7	31.64	16.9541	15.1
	5	1217	1	15	0.94	14.06	14	0.96	13.04	15	2.98	12.02	39.12	20.7274	21.2
	6	1217	1	15	0.86	14.14	14	3.28	10.72	15	1.24	13.76	38.62	20.4752	20.15
	7	1217	1	15	1.4	13.6	14	1.6	12.4	15	1.28	13.72	39.72	21.0301	22.6
	8	1217	1	15	0.24	14.76	14	0.56	13.44	15	0.42	14.58	42.78	22.5737	21.7
H	1	1218	2	16	0.9	15.1	15	4.84	10.16	14	5.04	8.96	34.22	18.1168	6.7
	2	1218	2	16	0.54	15.46	15	2.82	12.18	14	5.82	8.18	35.82	18.9329	13.7
	3	1218	2	16	0.5	15.5	15	0.24	14.76	14	0.82	13.18	43.44	22.8196	9.6
	4	1218	2	16	0.44	15.56	15	1.44	13.56	14	1.66	12.34	41.46	21.8097	14.2
	5	1218	2	16	0.62	15.38	15	3.74	11.26	14	1.18	12.82	39.46	20.7895	18.8
	6	1218	2	16	2.86	13.14	15	4.38	10.62	14	2.88	11.12	34.88	18.4534	17.1
	7	1218	2	16	0.72	15.28	15	0.9	14.1	14	0.18	13.82	43.2	22.6972	21.5
	8	1218	2	16	0.18	15.82	15	0.2	14.8	14	0.88	13.12	43.74	22.9726	24.1
I	1	1218	2	16	0.08	15.92	15	1.3	13.7	14	0.72	13.28	42.9	22.9771	11.4
	2	1218	2	16	0.22	15.78	15	2.56	12.44	14	6.06	7.94	36.16	19.5907	14.7
	3	1218	2	16	1.46	14.54	15	1.98	13.02	14	2.76	11.24	38.8	20.9171	14.4
	4	1218	2	16	0.24	15.76	15	4.66	10.34	14	2.26	11.74	37.84	20.4348	12.2
	5	1218	2	16	0.08	15.92	15	1.18	13.82	14	0.5	13.5	43.24	23.148	19.2
	6	1218	2	16	0	16	15	1.02	13.98	14	3.8	10.2	40.18	21.6105	17.4
	7	1218	2	16	0.02	15.98	15	2.66	12.34	14	0.32	13.68	42	22.5249	25.1
	8	1218	2	16	0.14	15.86	15	2.62	12.38	14	2.1	11.9	40.14	21.5904	25.6
J	1	1218	2	16	1.3	14.7	15	4.52	10.48	14	2.5	11.5	36.68	19.5191	6.8
	2	1218	2	16	1.44	14.56	15	2.22	12.78	14	1.44	12.56	39.9	21.1435	9.1
	3	1218	2	16	0.56	15.44	15	1.94	13.06	14	1.86	12.14	40.64	21.5168	14.1
	4	1218	2	16	1.48	14.52	15	3.28	11.72	14	1.44	12.56	38.8	20.5886	15.3
	5	1218	2	16	0.2	15.8	15	3.18	11.82	14	2.4	11.6	39.22	20.8004	21.8
	6	1218	2	16	1.08	14.92	15	1.74	13.26	14	2.62	11.38	39.56	20.9719	20.15
	7	1218	2	16	0.06	15.94	15	0.78	14.22	14	3.76	10.24	40.4	21.3957	23.65
	8	1218	2	16	0	16	15	0.2	14.8	14	0.44	13.56	44.36	23.3933	22
H	1	1219	3	16	1.58	14.42	15	4.96	10.04	14	0.64	13.36	37.82	19.953	7
	2	1219	3	16	0.16	15.84	15	4.22	10.78	14	0.3	13.7	40.32	21.2282	14.2
	3	1219	3	16	0.26	15.74	15	1.72	13.28	14	0	14	43.02	22.6054	10.7
	4	1219	3	16	0.58	15.42	15	2.9	12.1	14	0.02	13.98	41.5	21.8301	14.8
	5	1219	3	16	2.08	13.92	15	4.26	10.74	14	0.36	13.64	38.3	20.1979	19.5
	6	1219	3	16	1.12	14.88	15	3.16	11.84	14	0	14	40.72	21.4322	18.2
	7	1219	3	16	0	16	15	2.04	12.96	14	0	14	42.96	22.5748	22.4
	8	1219	3	16	0	16	15	1.7	13.3	14	0.08	13.92	43.22	22.7074	25.2
I	1	1219	3	16	0	16	15	2.38	12.62	14	0.1	13.9	42.52	22.7862	12.4
	2	1219	3	16	2.76	13.24	15	4.02	10.98	14	0.72	13.28	37.5	20.264	15.5
	3	1219	3	16	1.96	14.04	15	4.64	10.36	14	2.34	11.66	36.06	19.5405	14.5
	4	1219	3	16	2.4	13.6	15	5.8	9.2	14	10	4	26.8	14.8879	13.2
	5	1219	3	16	2.26	13.74	15	5.1	9.9	14	0	14	37.64	20.3343	20.2
	6	1219	3	16	0.32	15.68	15	3.12	11.88	14	0.34	13.66	41.22	22.133	18.4
	7	1219	3	16	0	16	15	4.5	10.5	14	3.74	10.26	36.76	19.8922	25.95
	8	1219	3	16	0.62	15.38	15	2.36	12.64	14	0	14	42.02	22.535	27.3
J	1	1219	3	16	3.38	12.62	15	5.38	9.62	14	2.04	11.96	34.2	18.2681	7.05
	2	1219	3	16	0.46	15.54	15	4.8	10.2	14	1.96	12.04	37.78	20.074	9.4
	3	1219	3	16	0.18	15.82	15	1.28	13.72	14	0.9	13.1	42.64	22.5257	14.15
	4	1219	3	16	0.36	15.64	15	4.86	10.14	14	0.34	13.66	39.44	20.9114	16.5
	5	1219	3	16	1.54	14.46	15	4.02	10.98	14	1.38	12.62	38.06	20.2153	22
	6	1219	3	16	0.98	15.02	15	3.88	11.12	14	0.92	13.08	39.22	20.8004	20.15
	7	1219	3	16	0.66	15.34	15	4.06	10.94	14	1.42	12.58	38.86	20.6188	23.65
	8	1219	3	16	0	16	15	1.34	13.66	14	0.1	13.9	43.56	22.9898	22
H	1	1220	4	16	3.24	12.76	15	4.38	10.62	14	1.6	12.4	35.78	18.9125	10.3
	2	1220	4	16	0.14	15.86	15	2.92	12.08	14	5.06	8.94	36.88	19.4736	13.3
	3	1220	4	16	0	16	15	0.92	14.08	14	0.62	13.38	43.46	22.8298	14.1
	4	1220	4	16	0.14	15.86	15	1.7	13.3	14	0.32	13.68	42.84	22.5136	15.1
	5	1220	4	16	1.72	14.28	15	2.12	12.88	14	0.12	13.88	41.04	21.5954	17.7
	6	1220	4	16	0.46	15.54	15	2.42	12.58	14	0.08	13.92	42.04	22.1055	21.2
	7	1220	4	16	0.54	15.46	15	0.1	14.9	14	1.64	12.36	42.72	22.4524	23.6
	8	1220	4	16	0	16	15	0.3	14.7	14	1.08	12.92	43.62	22.9114	26.8
I	1	1220	4	16	0.22	15.78	15	0.56	14.44	14	0.22	13.78	44	23.5298	12.8
	2	1220	4	16	0.4	15.6	15	0.9	14.1	14	2.84	11.16	40.86	21.9522	18.8
	3	1220	4	16	0.4	15.6	15	2.76	12.24	14	2.52	11.48	39.32	21.1784	16.1
	4	1220	4	16	0.28	15.72	15	1	14	14	0.88	13.12	42.84	22.947	12.5
	5	1220	4	16	0.76	15.24	15	1.3	13.7	14	2.92	11.08	40.02	21.5301	18.4
	6	1220	4	16	0.54	15.46	15	2.76	12.24	14	3.88	10.12	37.82	20.4247	17.8
	7	1220	4	16	1.14	14.86	15	2.64	12.36	14	6.54	7.46	34.68	18.8471	27.5
	8	1220	4	16	0.76	15.24	15	0.56	14.44	14	1.1	12.9	42.58	22.8164	26.5
J	1	1220	4	16	0.96	15.04	15	5.08	9.92	14	4.74	9.26	34.22	18.2782	7.8
	2	1220	4	16	0.42	15.58	15	2.82	12.18	14	4.12	9.88	37.64	20.0034	10.9
	3	1220	4	16	2.5	13.5	15	1.62	13.38	14	3.8	10.2	37.08	19.7209	14.3
	4	1220	4	16	0.44	15.56	15	3.96	11.04	14	3.96	10.04	36.64	19.4989	17.4
	5	1220	4	16	0.9	15.1	15	3.92	11.08	14	3.34	10.66	36.84	19.5998	18.1
	6	1220	4	16	0.34	15.66	15	2.72	12.28	14	3.8	10.2	38.14	20.2556	21.4
	7	1220	4	16	0.72	15.28	15	4.62	10.38	14	2.52	11.48	37.14	19.7512	25.9
	8	1220	4	16	0.06	15.94	15	0.76	14.24	14	1	13	43.18	22.7981	26.7
H	1	1221	5	16	1.16	14.84	15	2.44	12.56	14	4.18	9.82	37.22	19.647	10.1
	2	1221	5	16	1.26	14.74	15	6.08	8.92	14	4.32	9.68	33.34	17.6679	13.4
	3	1221	5	16	0.6	15.4	15	4.48	10.52	14	2.2	11.8	37.72	19.902	14.3
	4	1221	5	16	0.16	15.84	15	2	13	14	6.42	7.58	36.42	19.2389	15.5
	5	1221	5	16	1.14	14.86	15	5.3	9.7	14	1.04	12.96	37.52	19.8	21.2
	6	1221	5	16	0.34	15.66	15	2.98	12.02	14	2.08	11.92	39.6	20.861	19.5
	7	1221	5	16	0.4	15.6	15	1.26	13.74	14	1.42	12.58	41.92	22.0443	16.9
	8	1221	5	16	0.24	15.76	15	3.9	11.1	14	0.86	13.14	40	21.065	27.7
I	1	1221	5	16	0.96	15.04	15	4.12	10.88	14	0.64	13.36	39.28	21.1583	10.5
	2	1221	5	16	5.6	10.4	15	8.06	6.94	14	2.38	11.62	28.96	15.9732	15.3
	3	1221	5	16	2.64	13.36	15	4.4	10.6	14	1.5	12.5	36.46	19.7414	12.4
	4	1221	5	16	1.28	14.72	15	1	14	14	3.3	10.7	39.42	21.2286	13.1
	5	1221	5	16	0.92	15.08	15	7.66	7.34	14	0.94	13.06	35.48	19.249	20.8
	6	1221	5	16	0.48	15.52	15	3.66	11.34	14	1.24	12.76	39.62	21.3291	16.1
	7	1221	5	16	0	16	15	3.88	11.12	14	0.96	13.04	40.16	21.6005	24.6
	8	1221	5	16	0.38	15.62	15	3.2	11.8	14	1.14	12.86	40.28	21.6607	26.2
J	1	1221	5	16	2.48	13.52	15	7.48	7.52	14	4.34	9.66	30.7	16.5025	10.1
	2	1221	5	16	0.22	15.78	15	5.04	9.96	14	3.48	10.52	36.26	19.3072	13
	3	1221	5	16	1.22	14.78	15	3.74	11.26	14	3	11	37.04	19.7007	14.1
	4	1221	5	16	2.66	13.34	15	5.46	9.54	14	0.82	13.18	36.06	19.2064	19.1
	5	1221	5	16	1.56	14.44	15	5.12	9.88	14	1.6	12.4	36.72	19.5393	20.3
	6	1221	5	16	2.14	13.86	15	5.34	9.66	14	3	11	34.52	18.4295	21.5
	7	1221	5	16	1.38	14.62	15	3.86	11.14	14	3.18	10.82	36.58	19.4687	26.7
	8	1221	5	16	0.22	15.78	15	2.88	12.12	14	1.06	12.94	40.84	21.6176	27.7
H	1	1222	6	16	4.4	11.6	15	4.32	10.68	14	3.26	10.74	33.02	17.5047	8.9
	2	1222	6	16	1.58	14.42	15	5.64	9.36	14	3.26	10.74	34.52	18.2698	12.8
	3	1222	6	16	1.46	14.54	15	2.02	12.98	14	0.96	13.04	40.56	21.3506	11.6
	4	1222	6	16	1.24	14.76	15	1.24	13.76	14	0.72	13.28	41.8	21.9831	10.6
	5	1222	6	16	0.66	15.34	15	3.44	11.56	14	3.24	10.76	37.66	19.8714	21.7
	6	1222	6	16	0.98	15.02	15	4.46	10.54	14	1.44	12.56	38.12	20.1061	21.4
	7	1222	6	16	0.94	15.06	15	0.78	14.22	14	1.48	12.52	41.8	21.9831	29.6
	8	1222	6	16	1.52	14.48	15	3.04	11.96	14	1.96	12.04	38.48	20.2897	22.9
I	1	1222	6	16	0.04	15.96	15	1.4	13.6	14	1.5	12.5	42.06	22.5551	13.1
	2	1222	6	16	4.12	11.88	15	4.4	10.6	14	3.38	10.62	33.1	18.0532	16.7
	3	1222	6	16	1.06	14.94	15	1.26	13.74	14	3.7	10.3	38.98	21.0076	11.6
	4	1222	6	16	0.44	15.56	15	4.14	10.86	14	2.88	11.12	37.54	20.2841	16.3
	5	1222	6	16	0.28	15.72	15	5.52	9.48	14	1.72	12.28	37.48	20.2539	19.6
	6	1222	6	16	0.52	15.48	15	4.5	10.5	14	1.82	12.18	38.16	20.5956	15.1
	7	1222	6	16	2.84	13.16	15	2.02	12.98	14	1.5	12.5	38.64	20.8367	20.1
	8	1222	6	16	0.28	15.72	15	4.26	10.74	14	2.62	11.38	37.84	20.4348	26.8
J	1	1222	6	16	1.64	14.36	15	5.4	9.6	14	3.54	10.46	34.42	18.379	7.8
	2	1222	6	16	1.84	14.16	15	3.12	11.88	14	3.7	10.3	36.34	19.3476	12.3
	3	1222	6	16	1.72	14.28	15	2.66	12.34	14	1.24	12.76	39.38	20.8811	14
	4	1222	6	16	0.62	15.38	15	5.96	9.04	14	2.56	11.44	35.86	19.1055	19.7
	5	1222	6	16	0.04	15.96	15	0.56	14.44	14	1.88	12.12	42.52	22.4651	18.6
	6	1222	6	16	0.82	15.18	15	3.28	11.72	14	3	11	37.9	20.1345	20.8
	7	1222	6	16	0.58	15.42	15	2.7	12.3	14	3.76	10.24	37.96	20.1648	23.1
	8	1222	6	16	0.18	15.82	15	0.72	14.28	14	1.44	12.56	42.66	22.5358	23.6
H	1	1223	7	16	5.34	10.66	15	3.22	11.78	5	0	5	27.44	14.5261	10.1
	2	1223	7	16	0.32	15.68	15	1.92	13.08	5	0	5	33.76	17.7497	13.3
	3	1223	7	16	0.68	15.32	15	0.82	14.18	5	0	5	34.5	18.1271	14.5
	4	1223	7	16	0.06	15.94	15	3.1	11.9	5	0	5	32.84	17.2804	15.4
	5	1223	7	16	2.46	13.54	15	2.82	12.18	8	0	8	33.72	17.7735	21.2
	6	1223	7	16	0.22	15.78	15	0.88	14.12	5	0	5	34.9	18.3312	19.9
	7	1223	7	16	0.16	15.84	15	0.6	14.4	5	0	5	35.24	18.5046	16.1
	8	1223	7	16	0.16	15.84	15	0.32	14.68	5	0	5	35.52	18.6474	27.4
I	1	1223	7	16	0.06	15.94	15	2.84	12.16	5	0	5	33.1	17.7687	10.5
	2	1223	7	16	1.64	14.36	15	2.98	12.02	5	0	5	31.38	16.9045	15.8
	3	1223	7	16	1.22	14.78	15	4.64	10.36	5	0	5	30.14	16.2815	12.6
	4	1223	7	16	0.54	15.46	15	5.12	9.88	5	0	5	30.34	16.382	13.4
	5	1223	7	16	0.54	15.46	15	4.18	10.82	5	0	5	31.28	16.8543	20.9
	6	1223	7	16	0.34	15.66	15	6.04	8.96	5	0	5	29.62	16.0202	17.2
	7	1223	7	16	0	16	15	2.04	12.96	5	0	5	33.96	18.2008	24.5
	8	1223	7	16	1.26	14.74	15	3.18	11.82	5	0	5	31.56	16.995	28.4
J	1	1223	7	16	2.7	13.3	15	3.5	11.5	5	0	5	29.8	15.8453	10.2
	2	1223	7	16	0.34	15.66	15	1.62	13.38	5	0	5	34.04	17.9842	13
	3	1223	7	16	3.36	12.64	15	4.02	10.98	5	0	5	28.62	15.2501	13.2
	4	1223	7	16	0.42	15.58	15	5.04	9.96	5	0	5	30.54	16.2186	19.1
	5	1223	7	16	0.46	15.54	15	6.06	8.94	5	0	5	29.48	15.6839	20.3
	6	1223	7	16	0.5	15.5	15	3.98	11.02	5	0	5	31.52	16.713	21.5
	7	1223	7	16	0.58	15.42	15	2.5	12.5	5	0	5	32.92	17.4192	26.5
	8	1223	7	16	0.06	15.94	15	0.62	14.38	5	0	5	35.32	18.6299	27.7
H	1	1224	8	16	4.76	11.24	15	3.24	11.76	14	6.78	7.22	30.22	16.2703	7.5
	2	1224	8	16	6.02	9.98	15	2.9	12.1	14	5.68	8.32	30.4	16.3604	12.2
	3	1224	8	16	2.94	13.06	15	0.26	14.74	14	1.4	12.6	40.4	21.3671	14.9
	4	1224	8	16	3.34	12.66	15	0.56	14.44	14	2.6	11.4	38.5	20.4158	13.3
	5	1224	8	16	4.28	11.72	15	0.22	14.78	14	0.86	13.14	39.64	20.9866	18.7
	6	1224	8	16	9.12	6.88	15	1.18	13.82	14	0.6	13.4	34.1	18.2129	20.5
	7	1224	8	16	2.88	13.12	15	0.12	14.88	14	0.4	13.6	41.6	21.9679	22.3
	8	1224	8	16	4.38	11.62	15	0.62	14.38	14	1.12	12.88	38.88	20.6061	26.3
I	1	1224	8	16	0.84	15.16	15	0.06	14.94	14	1.82	12.18	42.28	22.2907	11.9
	2	1224	8	16	4.86	11.14	15	1.96	13.04	14	2.9	11.1	35.28	18.7408	13.8
	3	1224	8	16	7.74	8.26	15	1.62	13.38	14	2.84	11.16	32.8	17.4831	11.1
	4	1224	8	16	3.74	12.26	15	2.62	12.38	14	2.64	11.36	36	19.1059	16.1
	5	1224	8	16	3.78	12.22	15	1.7	13.3	14	3.62	10.38	35.9	19.0552	19.4
	6	1224	8	16	3.26	12.74	15	1.54	13.46	14	2.36	11.64	37.84	20.0391	17.5
	7	1224	8	16	1.42	14.58	15	0	15	14	0.28	13.72	43.3	22.808	24
	8	1224	8	16	0.34	15.66	15	1.34	13.66	14	1.96	12.04	41.36	21.8242	28.6
J	1	1224	8	16	3.64	12.36	15	3.58	11.42	14	4.28	9.72	33.5	17.7592	6.6
	2	1224	8	16	4.24	11.76	15	0.72	14.28	14	1.64	12.36	38.4	20.2778	12.5
	3	1224	8	16	6.24	9.76	15	1.28	13.72	14	3.96	10.04	33.52	17.7695	18.9
	4	1224	8	16	4.38	11.62	15	2.06	12.94	14	2.84	11.16	35.72	18.9003	15.1
	5	1224	8	16	5	11	15	0.18	14.82	14	2.4	11.6	37.42	19.7741	16.8
	6	1224	8	16	3.56	12.44	15	1.54	13.46	14	2.02	11.98	37.88	20.0105	19.2
	7	1224	8	16	4.22	11.78	15	0.12	14.88	14	1.42	12.58	39.24	20.7095	21.5
	8	1224	8	16	1.48	14.52	15	0	15	14	0.76	13.24	42.76	22.5188	23.5
H	1	1225	9	16	4.24	11.76	15	6.18	8.82	14	0.9	13.1	33.68	18.0026	9.7
	2	1225	9	16	4.9	11.1	15	5.86	9.14	14	4.84	9.16	29.4	15.8597	12.9
	3	1225	9	16	2	14	15	3.06	11.94	14	0.52	13.48	39.42	20.8764	12.6
	4	1225	9	16	2.02	13.98	15	4.58	10.42	14	0.12	13.88	38.28	20.3057	14.9
	5	1225	9	16	1.8	14.2	15	4.22	10.78	14	0.42	13.58	38.56	20.4458	16.8
	6	1225	9	16	1.36	14.64	15	4.08	10.92	14	1.54	12.46	38.02	20.1755	20.2
	7	1225	9	16	0.96	15.04	15	6.4	8.6	14	0	14	37.64	19.9852	22.5
	8	1225	9	16	0.92	15.08	15	3.26	11.74	14	0.5	13.5	40.32	21.327	25.6
I	1	1225	9	16	1.5	14.5	15	4.78	10.22	14	0.62	13.38	38.1	20.1709	11.9
	2	1225	9	16	2.02	13.98	15	6.64	8.36	14	5	9	31.34	16.7427	14.1
	3	1225	9	16	2.18	13.82	15	5.94	9.06	14	2.98	11.02	33.9	18.041	15.1
	4	1225	9	16	3.12	12.88	15	6.38	8.62	14	1.18	12.82	34.32	18.254	13.9
	5	1225	9	16	12.72	3.28	15	1.52	13.48	14	0.66	13.34	30.1	16.1139	20
	6	1225	9	16	1.38	14.62	15	6.6	8.4	14	1.56	12.44	35.46	18.8321	19.2
	7	1225	9	16	4.9	11.1	15	6.04	8.96	14	1.7	12.3	32.36	17.26	20
	8	1225	9	16	2.78	13.22	15	8.32	6.68	14	0.24	13.76	33.66	17.9192	29.1
J	1	1225	9	16	3.9	12.1	15	7.72	7.28	14	2.58	11.42	30.8	16.3715	7
	2	1225	9	16	5.92	10.08	15	2.82	12.18	14	4.4	9.6	31.86	16.9163	11.4
	3	1225	9	16	2.72	13.28	15	8.08	6.92	14	4.56	9.44	29.64	15.7752	16.5
	4	1225	9	16	2.6	13.4	15	6.4	8.6	14	2.48	11.52	33.52	17.7695	16.5
	5	1225	9	16	3.4	12.6	15	4.24	10.76	14	3.86	10.14	33.5	17.7592	18.4
	6	1225	9	16	2.62	13.38	15	4.32	10.68	14	1.28	12.72	36.78	19.4451	20.9
	7	1225	9	16	1.9	14.1	15	5.68	9.32	14	2.82	11.18	34.6	18.3246	24.7
	8	1225	9	16	0.26	15.74	15	7.06	7.94	14	0	14	37.68	19.9077	22.9
H	1	1226	10	16	2	14	15	6.46	8.54	14	3.94	10.06	32.6	17.4619	9.3
	2	1226	10	16	1.48	14.52	15	4.46	10.54	14	4.34	9.66	34.72	18.5233	13.7
	3	1226	10	16	0.12	15.88	15	2.8	12.2	14	1.38	12.62	40.7	21.5173	13.8
	4	1226	10	16	0.86	15.14	15	3.12	11.88	14	1.06	12.94	39.96	21.1468	14.2
	5	1226	10	16	2.16	13.84	15	5.94	9.06	14	0.5	13.5	36.4	19.3644	20.7
	6	1226	10	16	2.16	13.84	15	2.16	12.84	14	0.96	13.04	39.72	21.0266	19.6
	7	1226	10	16	0	16	15	2.84	12.16	14	0.04	13.96	42.12	22.2282	21.6
	8	1226	10	16	0.66	15.34	15	3.9	11.1	14	0.4	13.6	40.04	21.1868	25.7
I	1	1226	10	16	0.64	15.36	15	5.44	9.56	14	1.5	12.5	37.42	19.8261	11.5
	2	1226	10	16	3.24	12.76	15	6.86	8.14	14	4.92	9.08	29.98	16.053	14
	3	1226	10	16	1.52	14.48	15	5.84	9.16	14	1.04	12.96	36.6	19.4102	14.4
	4	1226	10	16	1.64	14.36	15	7	8	14	2.04	11.96	34.32	18.254	13.6
	5	1226	10	16	0.44	15.56	15	3.4	11.6	14	2.06	11.94	39.1	20.678	19.5
	6	1226	10	16	1.28	14.72	15	5.04	9.96	14	2.02	11.98	36.66	19.4406	20.5
	7	1226	10	16	0.26	15.74	15	5.86	9.14	14	1.3	12.7	37.58	19.9072	29.8
	8	1226	10	16	0.86	15.14	15	5.14	9.86	14	0.66	13.34	38.34	20.2926	28.2
J	1	1226	10	16	2.8	13.2	15	6.02	8.98	14	2.6	11.4	33.58	17.8004	7.4
	2	1226	10	16	0.18	15.82	15	4.26	10.74	14	2.74	11.26	37.82	19.9797	10
	3	1226	10	16	1.28	14.72	15	5.88	9.12	14	4.46	9.54	33.38	17.6976	14.3
	4	1226	10	16	1.8	14.2	15	4.38	10.62	14	2.7	11.3	36.12	19.1059	16.7
	5	1226	10	16	1.12	14.88	15	5.72	9.28	14	3.12	10.88	35.04	18.5508	16.7
	6	1226	10	16	0.66	15.34	15	4.26	10.74	14	3.7	10.3	36.38	19.2395	21
	7	1226	10	16	0.86	15.14	15	4.44	10.56	14	2.18	11.82	37.52	19.8255	26.2
	8	1226	10	16	0.4	15.6	15	2.02	12.98	14	0.82	13.18	41.76	22.0048	24.5
H	1	1227	11	16	1.36	14.64	15	6.46	8.54	14	2.32	11.68	34.86	18.5934	8.4
	2	1227	11	16	2.14	13.86	15	4.46	10.54	14	3.96	10.04	34.44	18.3831	12
	3	1227	11	16	1.2	14.8	15	2.8	12.2	14	0.48	13.52	40.52	21.4271	12.3
	4	1227	11	16	0.92	15.08	15	3.12	11.88	14	2.36	11.64	38.6	20.4659	12.6
	5	1227	11	16	2.14	13.86	15	5.94	9.06	14	1.92	12.08	35	18.6635	17.4
	6	1227	11	16	3.5	12.5	15	2.16	12.84	14	2.2	11.8	37.14	19.7349	20.7
	7	1227	11	16	0.48	15.52	15	2.84	12.16	14	1.2	12.8	40.48	21.4071	18.5
	8	1227	11	16	0.78	15.22	15	3.9	11.1	14	0.26	13.74	40.06	21.1968	25.1
I	1	1227	11	16	1.24	14.76	15	5.44	9.56	14	1.2	12.8	37.12	19.6739	12.3
	2	1227	11	16	4.46	11.54	15	6.86	8.14	14	0.4	13.6	33.28	17.7265	17.5
	3	1227	11	16	0.42	15.58	15	5.84	9.16	14	1.5	12.5	37.24	19.7348	14.1
	4	1227	11	16	2.14	13.86	15	7	8	14	2.26	11.74	33.6	17.8888	12.4
	5	1227	11	16	0.08	15.92	15	3.4	11.6	14	1.24	12.76	40.28	21.2765	19.5
	6	1227	11	16	1.76	14.24	15	5.04	9.96	14	1.6	12.4	36.6	19.4102	19.8
	7	1227	11	16	1.78	14.22	15	5.86	9.14	14	2.16	11.84	35.2	18.7002	23.1
	8	1227	11	16	1.6	14.4	15	5.14	9.86	14	4.26	9.74	34	18.0917	27.3
J	1	1227	11	16	2.2	13.8	15	6.02	8.98	14	3.44	10.56	33.34	17.677	10.5
	2	1227	11	16	2.3	13.7	15	4.26	10.74	14	3.56	10.44	34.88	18.4685	10.4
	3	1227	11	16	1.62	14.38	15	5.88	9.12	14	1.5	12.5	36	19.0442	14.1
	4	1227	11	16	1.44	14.56	15	4.38	10.62	14	1.98	12.02	37.2	19.661	17.4
	5	1227	11	16	1.02	14.98	15	5.72	9.28	14	3.4	10.6	34.86	18.4583	17.3
	6	1227	11	16	1.32	14.68	15	4.26	10.74	14	2.48	11.52	36.94	19.5274	17.8
	7	1227	11	16	0.52	15.48	15	4.44	10.56	14	1.22	12.78	38.82	20.4937	23.8
	8	1227	11	16	0.76	15.24	15	2.02	12.98	14	1.38	12.62	40.84	21.5319	23.1
H	1	1228	12	16	5.48	10.52	15	5.18	9.82	14	5.1	8.9	29.24	15.7796	8.7
	2	1228	12	16	5.54	10.46	15	3.48	11.52	14	6.52	7.48	29.46	15.8898	14.7
	3	1228	12	16	3.14	12.86	15	5.32	9.68	14	7.36	6.64	29.18	15.7496	12.7
	4	1228	12	16	1.32	14.68	15	2.26	12.74	14	1.06	12.94	40.36	21.347	13.8
	5	1228	12	16	1.16	14.84	15	5.3	9.7	14	5.16	8.84	33.38	17.8524	18.6
	6	1228	12	16	2.18	13.82	15	2.44	12.56	14	4.32	9.68	36.06	19.1942	21.1
	7	1228	12	16	1.36	14.64	15	1.16	13.84	14	2.3	11.7	40.18	21.2569	23.6
	8	1228	12	16	1.28	14.72	15	1.32	13.68	14	4.18	9.82	38.22	20.2756	25.8
I	1	1228	12	16	6.22	9.78	15	1.8	13.2	14	4.18	9.82	32.8	17.4831	11.8
	2	1228	12	16	3.3	12.7	15	5.1	9.9	14	4.64	9.36	31.96	17.0571	12.6
	3	1228	12	16	2.68	13.32	15	8.48	6.52	14	3.12	10.88	30.72	16.4283	14
	4	1228	12	16	5.22	10.78	15	5.96	9.04	14	6.38	7.62	27.44	14.7649	12
	5	1228	12	16	7.14	8.86	15	2.98	12.02	14	7.76	6.24	27.12	14.6026	19
	6	1228	12	16	5.36	10.64	15	4.16	10.84	14	3.34	10.66	32.14	17.1484	21.1
	7	1228	12	16	0.56	15.44	15	3.36	11.64	14	2.4	11.6	38.68	20.465	23.2
	8	1228	12	16	3.02	12.98	15	1.94	13.06	14	3.76	10.24	36.28	19.2479	26.9
J	1	1228	12	16	5.5	10.5	15	7.28	7.72	14	2.82	11.18	29.4	15.6519	6.9
	2	1228	12	16	1.28	14.72	15	6.3	8.7	14	4.72	9.28	32.7	17.348	9.5
	3	1228	12	16	5.52	10.48	15	5	10	14	5.6	8.4	28.88	15.3846	14
	4	1228	12	16	6.26	9.74	15	6.12	8.88	14	3.22	10.78	29.4	15.6519	17.3
	5	1228	12	16	2.08	13.92	15	4.3	10.7	14	5.96	8.04	32.66	17.3275	18.3
	6	1228	12	16	3.8	12.2	15	4.26	10.74	14	6.94	7.06	30	15.9603	22.2
	7	1228	12	16	5.7	10.3	15	5.64	9.36	14	6.06	7.94	27.6	14.7267	23.9
	8	1228	12	16	1.3	14.7	15	1.84	13.16	14	1.92	12.08	39.94	21.0693	22.6
H	1	1229	13	15	2.82	12.18	15	0.9	14.1	14	4.06	9.94	36.22	19.2489	8.4
	2	1229	13	15	3.12	11.88	15	6.94	8.06	14	3.64	10.36	30.3	16.285	14.3
	3	1229	13	15	6.14	8.86	15	4.5	10.5	14	3	11	30.36	16.3151	11.8
	4	1229	13	15	2.2	12.8	15	1.64	13.36	14	0.66	13.34	39.5	20.8911	14.9
	5	1229	13	15	3.82	11.18	15	3.46	11.54	14	0.86	13.14	35.86	19.0687	17.7
	6	1229	13	15	1.86	13.14	15	4.12	10.88	14	2.82	11.18	35.2	18.7383	19.6
	7	1229	13	15	2.82	12.18	15	2.24	12.76	14	3.62	10.38	35.32	18.7983	20.1
	8	1229	13	15	2.24	12.76	15	4.18	10.82	14	0.64	13.36	36.94	19.6094	24
I	1	1229	13	15	2.49	12.51	15	4.52	10.48	14	1.48	12.52	35.51	18.8386	10.2
	2	1229	13	15	1.56	13.44	15	5.32	9.68	14	6.52	7.48	30.6	16.3485	12
	3	1229	13	15	1.66	13.34	15	6.4	8.6	14	2.26	11.74	33.68	17.9105	13.1
	4	1229	13	15	1.22	13.78	15	2.94	12.06	14	2.32	11.68	37.52	19.8579	13.6
	5	1229	13	15	7.9	7.1	15	2.7	12.3	14	1.42	12.58	31.98	17.0484	19.4
	6	1229	13	15	3.74	11.26	15	5.24	9.76	14	1.06	12.94	33.96	18.0525	18.8
	7	1229	13	15	1.8	13.2	15	2.54	12.46	14	6.3	7.7	33.36	17.7482	24.8
	8	1229	13	15	4.08	10.92	15	7.52	7.48	14	2.1	11.9	30.3	16.1964	27.7
J	1	1229	13	15	3.76	11.24	15	7.54	7.46	14	4.52	9.48	28.18	15.0128	6.3
	2	1229	13	15	0.88	14.12	15	6.76	8.24	14	1.88	12.12	34.48	18.2509	8.4
	3	1229	13	15	2.92	12.08	15	3.66	11.34	14	4.9	9.1	32.52	17.2435	13.3
	4	1229	13	15	1.84	13.16	15	4.38	10.62	14	6.38	7.62	31.4	16.6678	15.5
	5	1229	13	15	2.24	12.76	15	5.02	9.98	14	3.32	10.68	33.42	17.7061	17.8
	6	1229	13	15	3.06	11.94	15	5.16	9.84	14	0.64	13.36	35.14	18.5902	18.1
	7	1229	13	15	1.22	13.78	15	5.78	9.22	14	2.52	11.48	34.48	18.2509	23
	8	1229	13	15	0.62	14.38	15	1.62	13.38	14	1.3	12.7	40.46	21.3246	21.8
H	1	1230	14	16	1	15	15	1.66	13.34	5	0	6.66	35	17.6043	8.7
	2	1230	14	16	0	16	15	0.3	14.7	5	0	5.3	36	18.7859	13.7
	3	1230	14	16	0.56	15.44	15	1.56	13.44	5	0	6.56	35.44	17.8747	12.7
	4	1230	14	16	0.46	15.54	15	1.58	13.42	5	0	6.58	35.54	17.9147	14.9
	5	1230	14	16	0.3	15.7	15	1.52	13.48	5	0	6.52	35.7	18.0249	21.4
	6	1230	14	16	0.34	15.66	15	2.74	12.26	5	0	7.74	35.66	17.3941	21.2
	7	1230	14	16	1.06	14.94	15	1.02	13.98	5	0	6.02	34.94	17.8947	20.7
	8	1230	14	16	0.2	15.8	15	0.78	14.22	5	0	5.78	35.8	18.4454	24.9
I	1	1230	14	16	0.3	15.7	15	2.12	12.88	5	0	7.12	35.7	17.7088	11.8
	2	1230	14	16	2.66	13.34	15	3.86	11.14	5	0	8.86	33.34	15.6296	12.1
	3	1230	14	16	0.82	15.18	15	1.62	13.38	5	0	6.62	35.18	17.6987	14.1
	4	1230	14	16	0.22	15.78	15	2.82	12.18	5	0	7.82	35.78	17.3944	12.5
	5	1230	14	16	4.02	11.98	15	1.58	13.42	5	0	6.58	31.98	16.0962	19.6
	6	1230	14	16	0.08	15.92	15	1.56	13.44	5	0	6.56	35.92	18.1044	19.6
	7	1230	14	16	0.44	15.56	15	2.06	12.94	5	0	7.06	35.56	17.6683	24
	8	1230	14	16	0	16	15	2.08	12.92	5	0	7.08	36	17.8813	27.2
J	1	1230	14	16	3.4	12.6	15	5.02	9.98	5	0	10.02	32.6	14.6083	6.3
	2	1230	14	16	0.46	15.54	15	0.7	14.3	5	0	5.7	35.54	18.3399	10
	3	1230	14	16	0.22	15.78	15	3.96	11.04	5	0	8.96	35.78	16.7876	14.5
	4	1230	14	16	0.78	15.22	15	2.16	12.84	5	0	7.16	35.22	17.425	15.8
	5	1230	14	16	0.14	15.86	15	2.38	12.62	5	0	7.38	35.86	17.6408	18.5
	6	1230	14	16	0	16	15	2.98	12.02	5	0	7.98	36	17.4044	19
	7	1230	14	16	0.38	15.62	15	3.02	11.98	5	0	8.02	35.62	17.1885	22.6
	8	1230	14	16	0	16	15	1.42	13.58	5	0	6.42	36	18.2062	21.9

## Sheet: VFA
	Group	Acetate	Propionate	Isobutyrate	Butyrate	Isovalerate	Valerate	Acetate/Propionate
	H1	58.7516	20.1174	0.705751	11.8184	1.1988	1.47855	2.92044
	H2	66.7465	20.0673	0.716195	11.2074	1.27613	1.01936	3.32613
	H3	65.9896	23.1043	0.632337	11.4918	1.36972	1.18189	2.85616
	H4	70.5855	25.8961	0.742192	16.3097	1.34895	1.78408	2.72572
	H5	67.0746	20.971	0.611937	11.2944	1.08834	1.19921	3.19845
	H6	61.9298	21.7098	0.73795	10.4338	1.09876	1.49406	2.85263
	H7	65.8646	23.9361	0.501372	14.7409	1.18124	1.49094	2.75168
	H8	67.4677	24.1119	0.660649	14.5624	1.58987	1.50742	2.79811
	I1	58.7147	21.9119	0.748223	11.8561	1.65652	1.39555	2.67958
	I2	67.1823	22.16	0.669676	13.1388	1.42582	1.24181	3.03169
	I3	66.9798	21.1737	0.794826	11.4958	1.68436	1.32258	3.16335
	I4	57.3404	23.9614	0.915974	12.3297	1.87525	1.66171	2.39303
	I5	59.0092	21.6502	0.702143	11.099	1.29349	1.29687	2.72557
	I6	70.2403	21.7191	0.764211	11.7639	1.62613	1.67683	3.23403
	I7	68.4523	25.4164	0.747874	15.1514	1.99159	1.85206	2.69323
	I8	53.8248	24.124	0.429596	11.6375	1.35358	1.66796	2.23117
	J1	60.5319	22.0463	0.791761	12.0179	1.45621	1.40407	2.74567
	J2	57.5664	18.4541	0.744864	10.848	1.27457	1.12317	3.11944
	J3	53.7492	18.314	0.698569	11.0443	1.32548	1.07671	2.93487
	J4	57.897	21.7129	0.853491	10.3677	0.919638	1.36614	2.66647
	J5	58.7625	24.6609	0.658914	11.1659	1.20926	1.37015	2.38282
	J6	63.9343	22.4104	0.734242	12.0599	1.4111	1.50181	2.85289
	J7	70.8533	25.0101	0.864586	16.363	1.68558	1.21466	2.83298
	J8	62.908	23.6354	0.646168	13.7909	1.00786	1.50343	2.6616

## Sheet: NH3-N
	NH3-N
H1	17.2724
H2	31.2964
H3	13.116
H4	26.3079
H5	30.1769
H6	25.6808
H7	17.44
H8	16.2911
I1	29.9976
I2	29.438
I3	32.1881
I4	23.9517
I5	37.5312
I6	13.2566
I7	29.4478
I8	19.7734
J1	42.2305
J2	37.23
J3	29.8292
J4	23.8648
J5	34.2682
J6	35.3338
J7	42.0367
J8	32.1738

## Sheet: biochemical
Group	ALT	AST	TBil	DBil	I-BiL	TP	ALB	GLOB	A/G	UREA	CR	UA	TG	TC	GGT	ALP
H1	19	81	14.68	2.60	12.08	79.00	36.2	42.8	0.85	3.89	69.0	9.5	0.06	6.35	74.60	89.2
H2	28	50	10.51	2.10	8.41	73.40	37.2	36.2	1.03	3.58	77.0	22.8	0.06	4.16	44.50	26.6
H3	26	66	6.64	1.73	4.91	66.20	30.5	35.7	0.85	2.49	61.0	22.1	0.10	4.51	28.50	343.0
H4	41	116	9.72	2.31	7.41	77.10	37.7	39.4	0.96	3.12	60.0	22.1	0.06	5.44	44.30	55.9
H5	32	67	11.71	2.55	9.16	75.00	36.3	38.7	0.94	2.97	70.0	20.0	0.05	5.96	38.60	51.2
H6	26	71	13.15	2.64	10.51	76.00	38.4	37.6	1.02	2.64	76.0	28.4	0.03	7.84	32.70	52.8
H7	37	70	14.00	2.27	11.73	71.40	35.5	35.9	0.99	3.31	80.0	42.4	0.02	6.56	41.80	40.8
H8	29	61	8.02	2.02	6.00	73.60	39.7	33.9	1.17	2.78	76.0	39.5	0.04	7.43	39.70	63.0
I1	28	67	8.93	2.04	6.89	76.20	35.9	40.3	0.89	4.10	63.0	18.7	0.05	5.28	29.30	97.5
I2	28	71	10.25	2.00	8.25	75.90	37.0	38.9	0.95	2.84	73.0	10.4	0.06	5.99	23.40	71.5
I3	30	44	11.59	2.21	9.38	66.20	36.4	29.8	1.22	3.77	91.0	26.0	0.07	5.11	38.90	57.8
I4	28	77	10.00	2.10	7.90	75.00	35.2	39.8	0.88	4.65	70.0	44.8	0.02	5.35	25.50	47.5
I5	38	72	10.17	2.16	8.01	69.50	34.0	35.5	0.96	3.02	74.0	24.2	0.05	7.30	34.90	59.5
I6	35	96	7.69	1.82	5.87	77.40	34.7	42.7	0.81	3.04	54.0	32.5	0.05	5.46	27.40	80.9
I7	25	72	13.25	2.64	10.61	75.10	35.4	39.7	0.89	3.27	46.0	41.5	0.04	7.96	36.90	59.0
I8	26	69	6.64	1.24	5.40	72.90	35.3	37.6	0.94	2.91	69.0	30.4	0.04	5.16	18.10	67.2
J1	22	72	11.16	2.14	9.02	76.70	36.0	40.7	0.88	3.73	75.0	31.4	0.09	5.19	32.30	49.7
J2	34	89	11.45	2.80	8.65	74.20	35.0	39.2	0.89	3.38	72.0	23.0	0.07	7.23	31.50	65.5
J3	25	68	11.18	2.11	9.07	87.20	31.9	55.3	0.58	2.82	60.0	26.7	0.06	5.93	36.40	44.4
J4	33	96	17.22	3.23	13.99	72.60	35.5	37.1	0.96	2.92	59.0	31.0	0.04	7.84	33.90	78.1
J5	31	66	9.28	2.09	7.19	70.60	37.4	33.2	1.13	4.12	75.0	37.6	0.06	7.37	35.40	117.7
J6	33	80	9.15	2.04	7.11	73.70	41.2	32.5	1.27	3.57	75.0	38.8	0.04	4.89	29.50	49.0
J7	33	78	8.55	1.83	6.72	68.10	36.0	32.1	1.12	2.87	88.0	33.6	0.04	5.89	36.00	62.9
J8	28	71	13.24	2.96	10.28	65.10	36.1	29.0	1.24	3.01	59.0	21.8	0.04	9.33	40.60	102.2

## Sheet: immune&antioxidant
Group number	IgA	IgM	IgG	GSH-PX	MDA	T-AOC	SOD	SOD/ MDA
H1	70.3873	25.6893	8.48	558.00	17.67	1.97	100.34	5.67855
H2	44.2719	19.4957	12.84	606.00	9.17	2.95	106.50	11.614
H3	58.7105	20.2458	15.37	714.00	5.17	2.54	114.72	22.1896
H4	45.2894	18.0169	8.05	714.00	11.67	2.47	107.09	9.17652
H5	46.1131	18.1455	9.05	672.00	15.83	2.34	107.68	6.80227
H6	48.681	18.1241	16.72	666.00	18.17	2.19	104.74	5.76445
H7	61.9083	21.9817	16.37	750.00	7.67	2.30	102.98	13.4263
H8	100.04	37.4764	22.45	672.00	14.00	2.47	111.20	7.94286
I1	42.4792	16.4525	13.46	726.00	7.33	2.71	107.97	14.7299
I2	47.7604	20.4815	9.52	570.00	15.67	2.34	108.56	6.92789
I3	54.156	25.3678	13.43	606.00	4.83	2.59	107.97	22.354
I4	42.4307	19.3028	7.76	678.00	13.17	3.70	109.44	8.30979
I5	54.2529	24.7463	9.17	720.00	20.00	2.59	109.73	5.4865
I6	76.4922	40.4124	15.31	702.00	9.67	1.97	109.73	11.3475
I7	45.4347	18.7456	21.01	624.00	26.33	1.97	104.45	3.96696
I8	43.5451	21.8317	60.37	666.00	5.17	1.23	113.84	22.0193
J1	40.8803	19.7957	9.49	708.00	13.50	4.81	107.38	7.95407
J2	55.9487	23.0961	16.19	714.00	5.33	3.70	106.50	19.9812
J3	64.5731	25.9464	15.43	738.00	4.50	4.32	107.97	23.9933
J4	60.2125	24.2962	19.66	582.00	5.50	2.84	97.70	17.7636
J5	59.5342	26.4393	10.49	756.00	5.67	3.70	110.32	19.4568
J6	46.9852	18.4241	13.99	666.00	12.67	3.82	110.61	8.73007
J7	46.8398	18.1026	12.55	750.00	6.67	2.23	113.25	16.979
J8	53.5677	22.3001	12.18	588.00	10.33	2.71	105.04	10.1684

## Sheet: Metabolites
Metabolites	ra
	A vs. B	A vs. C	B vs. C
	(df =7)	(df =7)	(df =7)
Ala(Alanine): 1.48(d)	-	-0.669	0.763
Lys(Lysine): 1.49(m), 1.74(m), 1.91(m)	0.743	-	0.697
Gln(Glutamine): 2.12(m), 2.42(m)	-	-	0.733
OAG(O-acetyl-glycoprotein): 2.13(s)	-	-	0.668
Cit(Citrate): 2.54(d), 2.68(d)	-	-0.748	0.695
Cr(Creatine): 3.03(s),3.93(s)	-	-	0.674
Gly(Glycine): 3.56(s)	-	-	0.731
Glucose: 3.42(t), 3.54(dd), 3.71(t), 3.73(m), 3.84(m), 3.25(dd), 3.41(t), 3.46(m), 3.49(t), 3.90(dd), 4.65(d), 5.23(d)	-	-	0.768
